# Supplementary material for: Surface modification of magnetite hybrid particles with carbohydrates and gold nanoparticlesvia “click” chemistry
Source: Royal Society of Chemistry journal article supplement (doi:10.1039/c2py20824e), 2012-10-25
Supplement: c2py20824e.pdf [file c2py20824e.pdf]

## Surface modification of Magnetite Hybrid Particles with Carbohydrates and Gold Nanoparticles via “Click” Chemistry

*M. Álvarez-Paino, G. Marcelo, A. Muñoz-Bonilla,\* J. Rodríguez-Hernández, M. Fernández-García\**

Instituto de Ciencia y Tecnología de Polímeros (ICTP-CSIC), C/ Juan de la Cierva 3, 28006-Madrid, Spain.

E-mail: sbonilla@ictp.csic.es; marta fg@ictp.csic.es

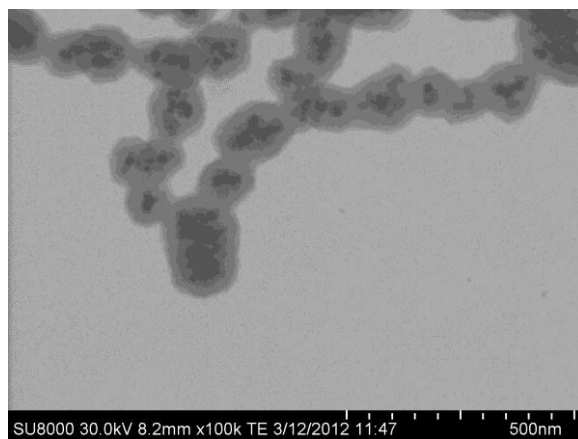

**Figure S1.** FE-SEM image of the  $\text{Fe}_3\text{O}_4$ @PFS hybrid particles without thiol groups at the surface and after the reduction of the gold precursor (control experiment).
